# Supplementary material
Source: PubMed Central journal article supplement (PMC2923994)
Supplement: supp_M110.141598_jbc.M110.141598-1.pdf [file supp_M110.141598_jbc.M110.141598-1.pdf]

**Supplemental Table 1. Nucleotide sequence of RT-PCR primer analyses**

---

SYBR Green RT-PCR

| <u>Gene</u>          | <u>Fwd</u>                 | <u>Rev</u>                 |
|----------------------|----------------------------|----------------------------|
| <b><i>36B4</i></b>   | GCAGACAACGTGGGCTCCAAGCAGAT | GGTCCTCCTTGGTGAACACGAAGCCC |
| <b><i>ADRP</i></b>   | GAGATGGCAGAGAACGGTGT       | AGCCCCTTACAGGCATAGGT       |
| <b><i>Apoa4</i></b>  | TGAACTCACCCAGCAACTCA       | ACCAGCTTCTTCTGCAGGTC       |
| <b><i>Apob</i></b>   | CTGGAAAATGTCAGCCTGGT       | TGGCACTTCTTGAATCAGCA       |
| <b><i>Apoc3</i></b>  | GAAGCACGCCACCAAGAC         | TTCAGGGAActGAAGCCATC       |
| <b><i>ApoE</i></b>   | CACTGTCTGAGCAGGTGCAG       | TCCAGTTCGGATTTGTAGGC       |
| <b><i>Cidea</i></b>  | TATGGGATCACAGACTAAGCGA     | TGCTCCTGTCATGGTTGGAGA      |
| <b><i>Cideb</i></b>  | AACCCAGTGACTTACTCAGG       | AGACACGGAAAGGTCGCTG        |
| <b><i>Cidec</i></b>  | AAGTCCCTTAGCCTTCTCTACC     | CCTTCCTCACGCTTCGATCC       |
| <b><i>Dgat1</i></b>  | ATGATGGCTCAGATCCCCT        | GCTATTGGCTGTCCGATGAT       |
| <b><i>Dgat2</i></b>  | TACTCCAAGCCCATCACCAC       | TGGTGTGGTACAGGTCGATG       |
| <b><i>Fas</i></b>    | TTCTTCGTGCAGCAGTTCAC       | GCTCTTGATGATCAGGTCCA       |
| <b><i>mGpat1</i></b> | CCAGAACAGAAAGAAATGTTGC     | TCCTTGAAAACCCCAATATCC      |
| <b><i>Mttp</i></b>   | GGTGCAATGGAGTTTAGCTTG      | GGCCAGCTTTCACAAAAGAG       |
| <b><i>Scd1</i></b>   | CCGGGAGAATATCCTGGTTT       | GCGGTACTCACTGGCAGAGT       |

---
